# Supplementary material for: Metabolomic profiling reveals amino acid and carnitine alterations as metabolic signatures in psoriasis
Source: PubMed Central journal article supplement (PMC7738860; doi:10.7150/thno.51154), 2021-01-01
Supplement: thnov11p0754s1.pdf [file thnov11p0754s1.pdf]

Figure S1. The phenotypes of IMQ-induced psoriasis mice models

A

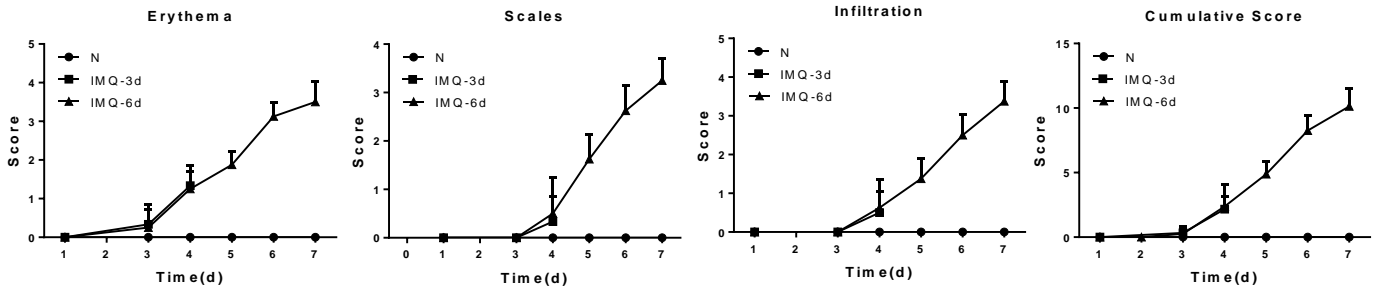

B

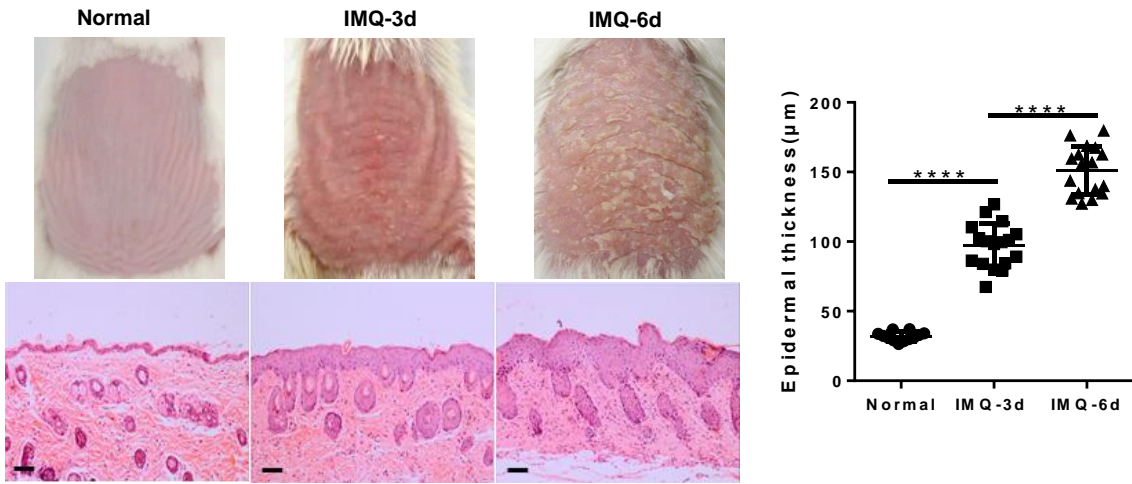

Figure S2. Quality control of Metabolomics profiling and metabolites classes identified in profiling

A

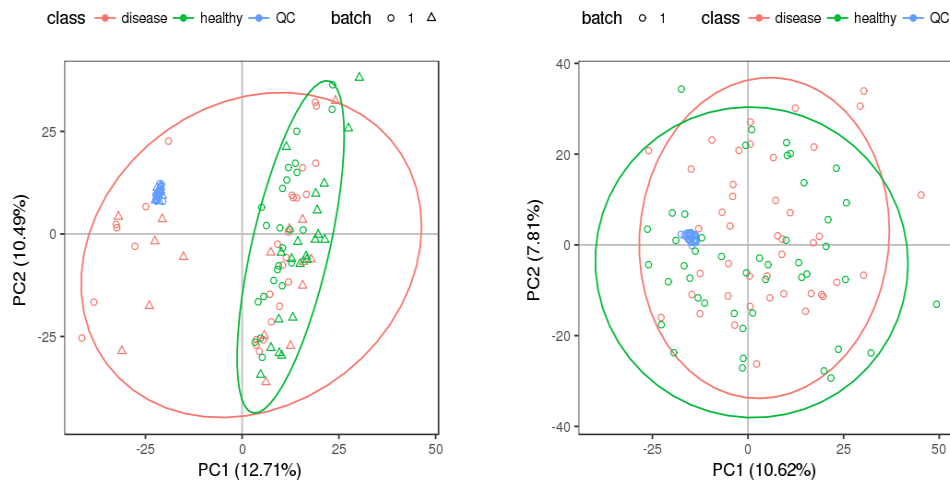

B

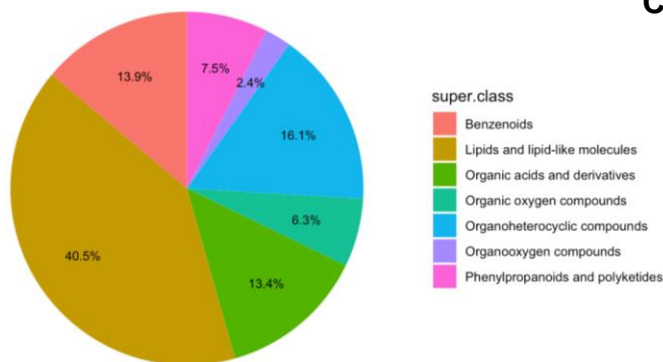

C

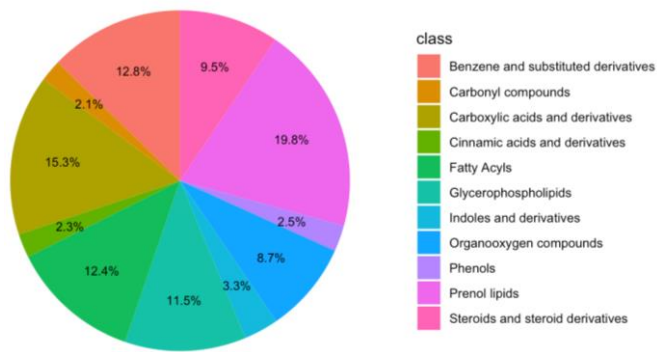

Figure S3. Pathway enrichment using amino acids, acyl-carnitines and identified differential metabolites

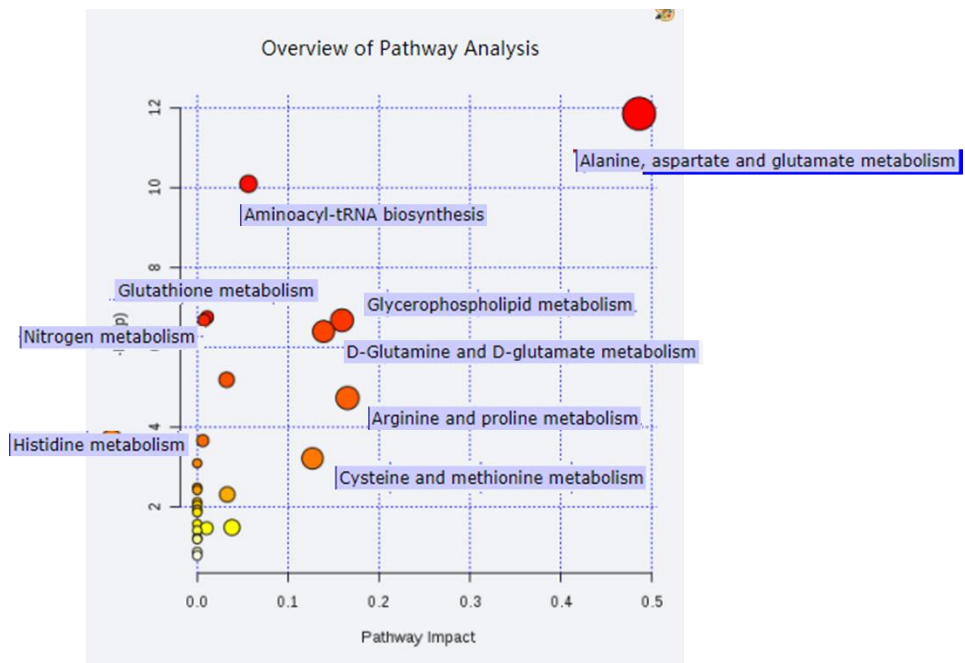

Figure S4. boxplot of amino acids in plasma of humans and mouse models

A

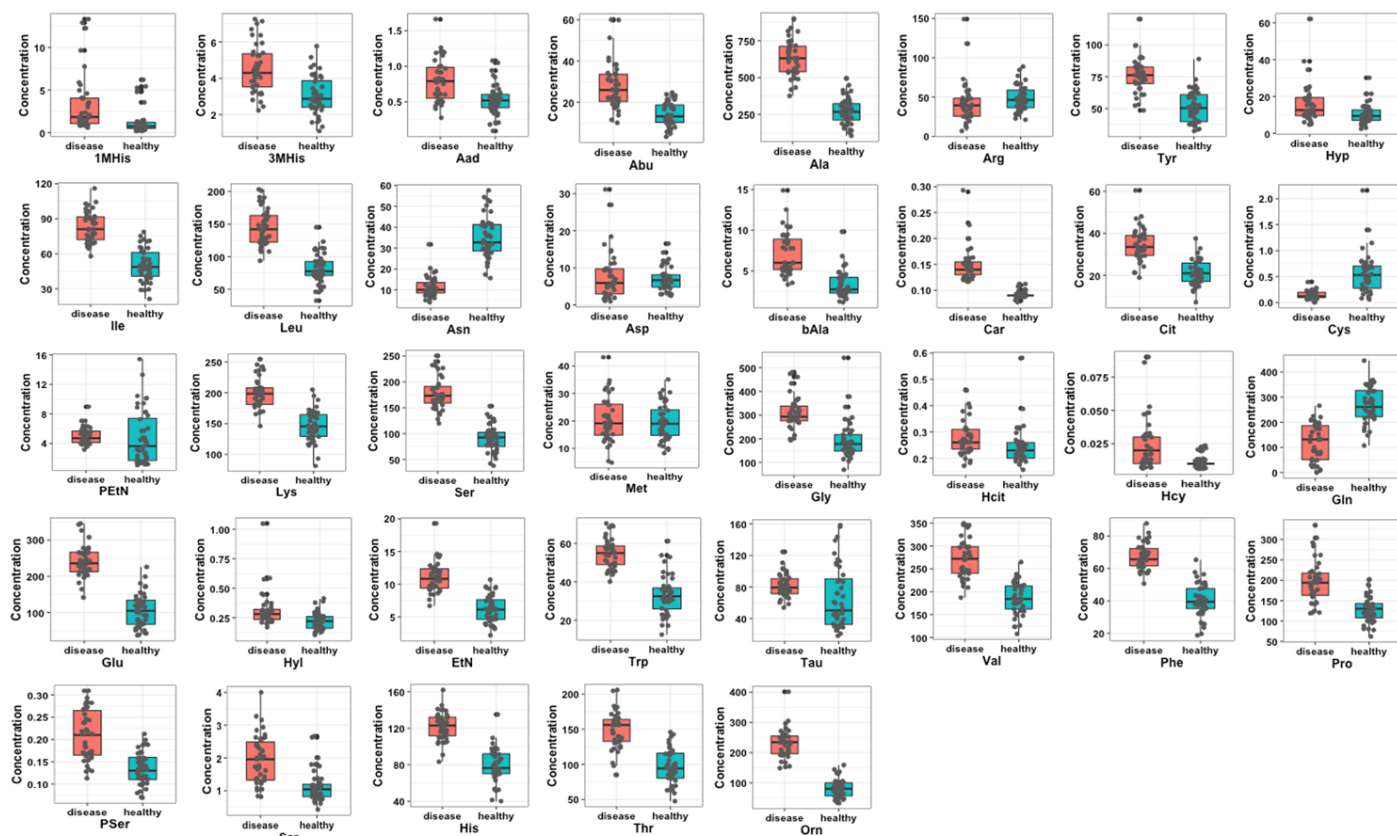

B

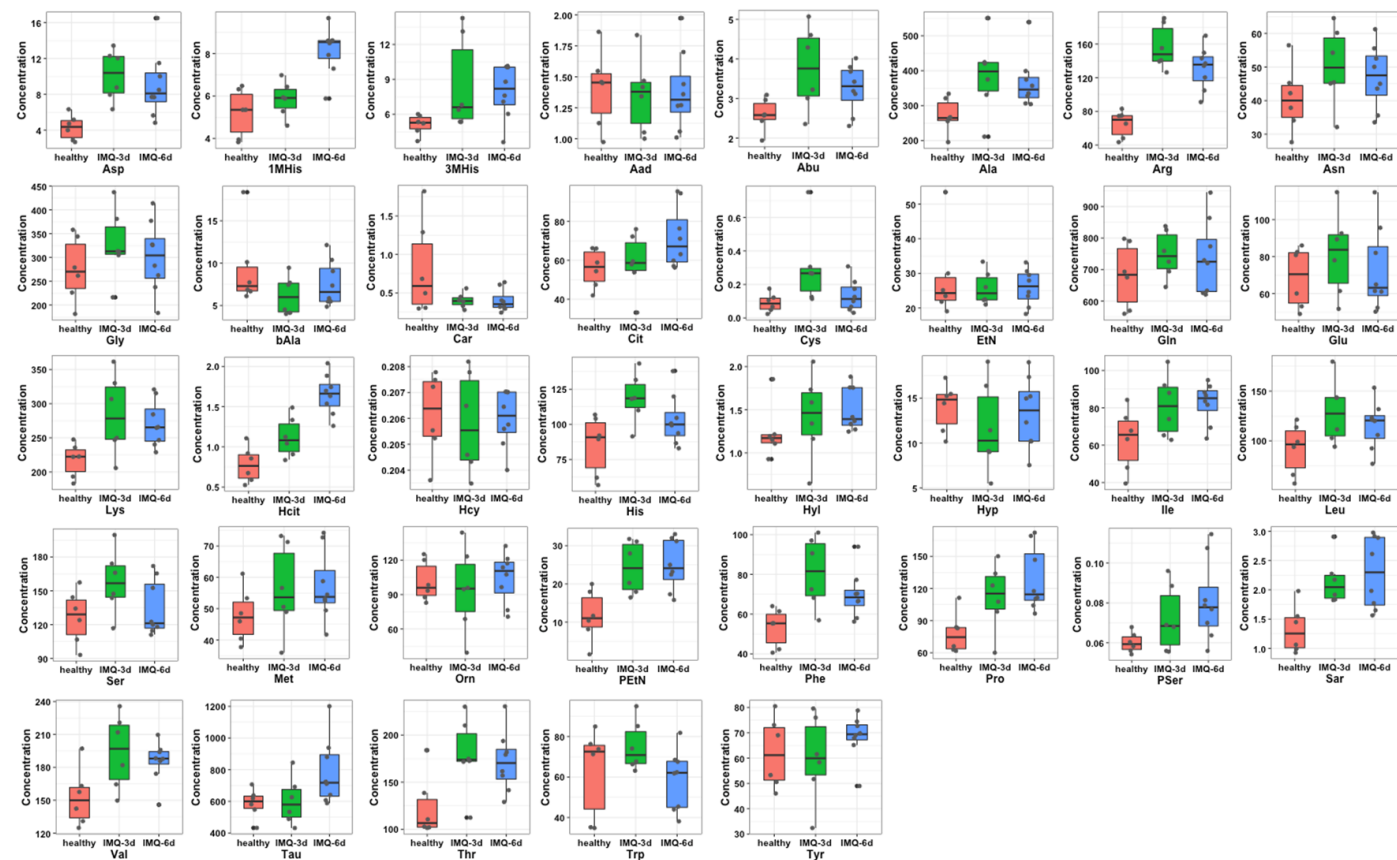

Figure S5. boxplot of carnitines in plasma of humans and mouse models

A

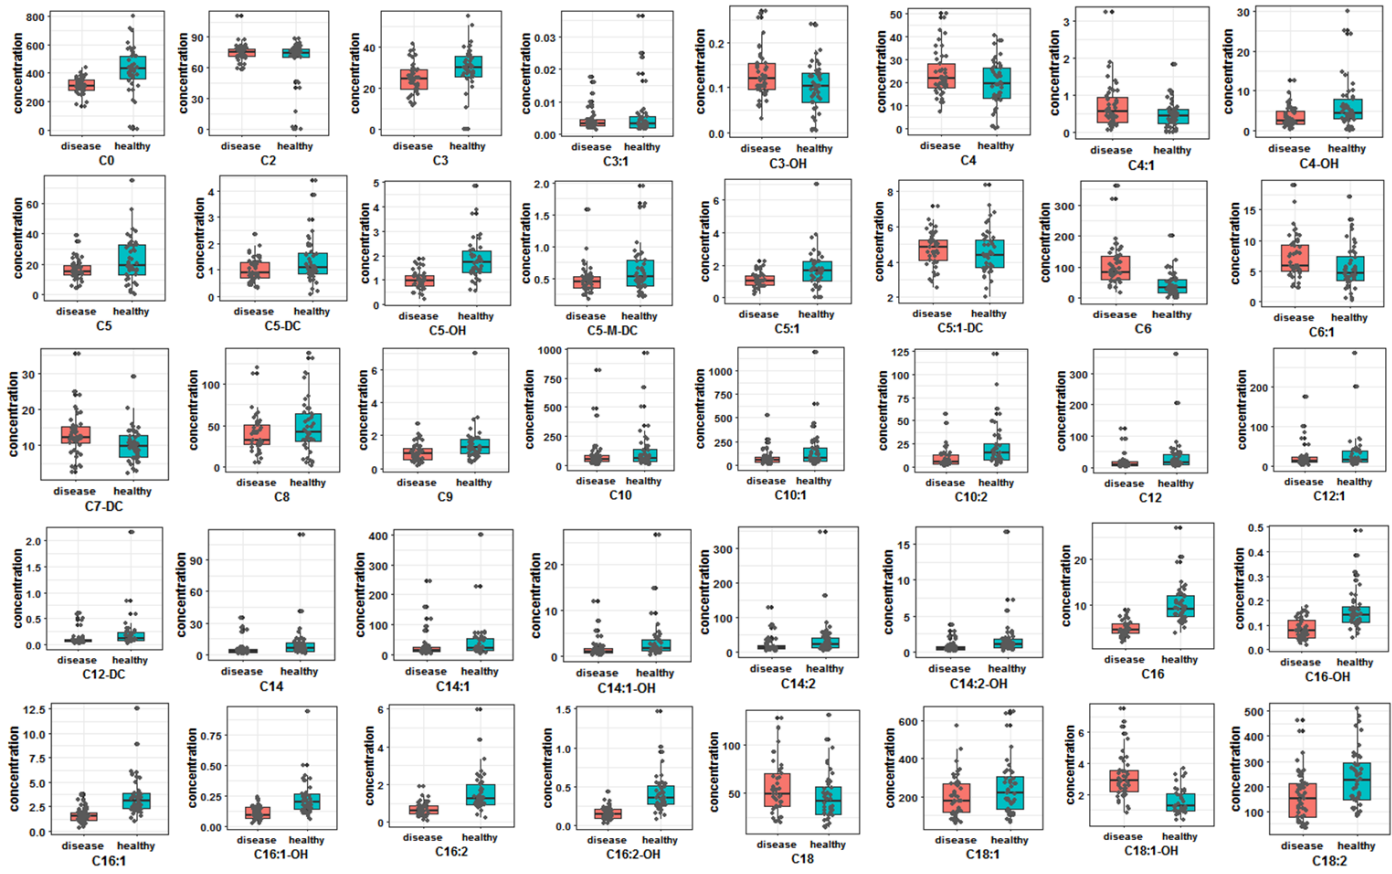

B

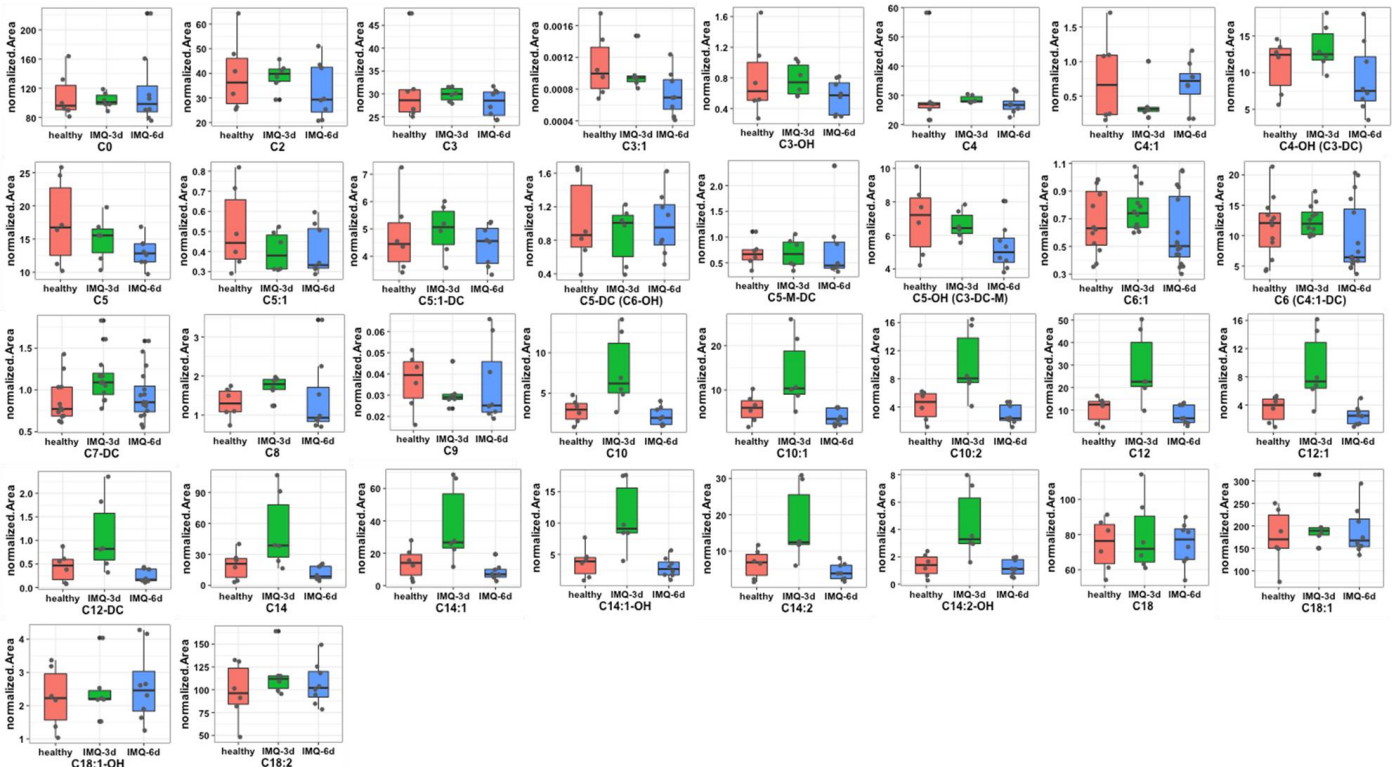

Figure S6.

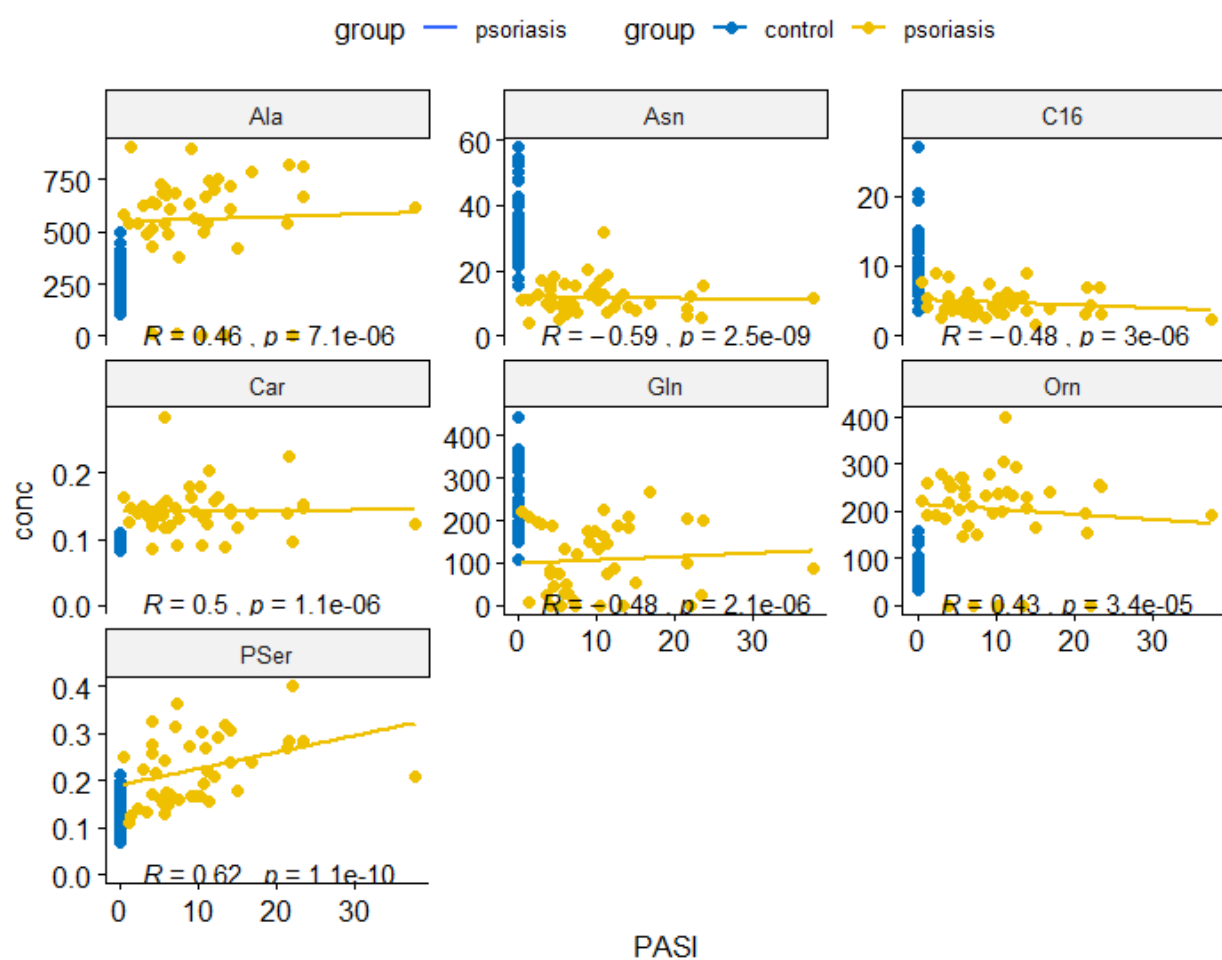

Table S1. A list of the antibodies for flow cytometry.

| <b>For mice</b>                    | <b>Source</b> |
|------------------------------------|---------------|
| Zombie Aqua™ Fixable Viability Dye | BioLegend     |
| Trustain fcX anti-mouse CD16/32    | BioLegend     |
| APC/Cy7 anti-mouse CD45            | BioLegend     |
| PerCP/Cy 5.5 anti-mouse Gr-1       | BioLegend     |
| PE Rat anti-mouse IL-17A           | BD Pharmingen |
| APC anti-mouse IFN-r               | BioLegend     |
| FITC anti-mouse CD4                | BioLegend     |
| Anti-mouse CD25 APC                | eBioscience   |
| Anti-mouse/rat Foxp3 PE            | eBioscience   |

Table S2. Leverages the organization of metabolic networks to predict functional activity directly from feature tables, bypassing metabolite identification

| Mode     | Pathway                                                         | Pathway total | Hits.total | Hits.sig | p.value |
|----------|-----------------------------------------------------------------|---------------|------------|----------|---------|
| positive | Butanoate metabolism                                            | 34            | 29         | 4        | 0.0002  |
| positive | Histidine metabolism                                            | 33            | 16         | 3        | 0.0002  |
| positive | Tryptophan metabolism                                           | 94            | 60         | 5        | 0.0002  |
| positive | Saturated fatty acids beta-oxidation                            | 36            | 17         | 3        | 0.0002  |
| positive | Glycine, serine, alanine and threonine metabolism               | 88            | 41         | 4        | 0.0002  |
| positive | Vitamin B3 (nicotinate and nicotinamide) metabolism             | 28            | 20         | 3        | 0.0002  |
| positive | Valine, leucine and isoleucine degradation                      | 65            | 43         | 4        | 0.0002  |
| positive | Vitamin B2 (riboflavin) metabolism                              | 8             | 4          | 2        | 0.0002  |
| positive | Di-unsaturated fatty acid beta-oxidation                        | 26            | 6          | 2        | 0.0003  |
| positive | Fatty acid activation                                           | 74            | 27         | 3        | 0.0003  |
| positive | Lysine metabolism                                               | 52            | 28         | 3        | 0.0003  |
| positive | Mono-unsaturated fatty acid beta-oxidation                      | 19            | 7          | 2        | 0.0004  |
| positive | Dimethyl-branched-chain fatty acid mitochondrial beta-oxidation | 19            | 8          | 2        | 0.0004  |
| positive | Alanine and Aspartate Metabolism                                | 30            | 12         | 2        | 0.0007  |
| positive | Vitamin B1 (thiamin) metabolism                                 | 20            | 13         | 2        | 0.0007  |
| positive | Vitamin B9 (folate) metabolism                                  | 33            | 17         | 2        | 0.0011  |
| positive | Propanoate metabolism                                           | 31            | 21         | 2        | 0.0016  |



Table S3. Correlation of amino acids and carnitines with PASI

| Component.Name | Correlation | p.value | compoundID | Correlation | p.value |
|----------------|-------------|---------|------------|-------------|---------|
| 1MHis          | 0.2065      | 0.0536  | C0         | -0.2827     | 0.0073  |
| 3MHis          | 0.3099      | 0.0033  | C10        | -0.0395     | 0.7134  |
| Aad_2          | 0.1788      | 0.0956  | C10:1      | -0.1239     | 0.2474  |
| Abu            | 0.3317      | 0.0016  | C10:2      | -0.1944     | 0.0679  |
| Ala            | 0.4484      | 0.0000  | C12        | -0.1423     | 0.1834  |
| Arg_2          | -0.2031     | 0.0578  | C12-DC     | -0.1400     | 0.1908  |
| Asn            | -0.5838     | 0.0000  | C12:1      | -0.1053     | 0.3260  |
| Asp            | 0.0488      | 0.6516  | C14        | -0.1352     | 0.2066  |
| bAla           | 0.3755      | 0.0003  | C14:1      | -0.1030     | 0.3366  |
| Car            | 0.4947      | 0.0000  | C14:1-OH   | -0.1863     | 0.0805  |
| Cit            | 0.2009      | 0.0605  | C14:2      | -0.1405     | 0.1892  |
| Cys            | -0.3862     | 0.0002  | C14:2-OH   | -0.1829     | 0.0862  |
| EtN            | 0.3388      | 0.0012  | C16        | -0.4737     | 0.0000  |
| Gln            | -0.4818     | 0.0000  | C16-OH     | -0.3904     | 0.0002  |
| Glu            | 0.3695      | 0.0004  | C16:1      | -0.3675     | 0.0004  |
| Gly            | 0.2734      | 0.0100  | C16:1-OH   | -0.3374     | 0.0012  |
| Hcit           | 0.2762      | 0.0092  | C16:2      | -0.3056     | 0.0036  |
| Hcy            | 0.3131      | 0.0030  | C16:2-OH   | -0.3942     | 0.0001  |
| His            | 0.2412      | 0.0236  | C18        | 0.1011      | 0.3457  |
| Hyl_1          | 0.1150      | 0.2860  | C18:1      | -0.1346     | 0.2087  |
| Hyp            | 0.1539      | 0.1524  | C18:1-OH   | 0.3736      | 0.0003  |
| Ile            | 0.2959      | 0.0051  | C18:2      | -0.1960     | 0.0656  |
| Leu            | 0.3404      | 0.0012  | C2         | 0.0832      | 0.4382  |
| Lys            | 0.1830      | 0.0878  | C3         | -0.1856     | 0.0816  |
| Met            | -0.1710     | 0.1111  | C3-OH      | 0.1115      | 0.2984  |
| Orn            | 0.4240      | 0.0000  | C3:1       | -0.0944     | 0.3789  |
| PEtN           | -0.0293     | 0.7867  | C4         | 0.0710      | 0.5086  |
| Phe_2          | 0.3183      | 0.0025  | C4-OH      | -0.2125     | 0.0456  |
| Pro            | 0.2034      | 0.0573  | C4:1       | 0.2046      | 0.0545  |
| PSer           | 0.6234      | 0.0000  | C5         | -0.1365     | 0.2022  |
| Sar            | 0.2914      | 0.0059  | C5-DC      | -0.1694     | 0.1125  |
| Ser            | 0.3591      | 0.0006  | C5-M-DC    | -0.1746     | 0.1018  |
| Tau            | 0.1211      | 0.2610  | C5-OH      | -0.3493     | 0.0008  |
| Thr_2          | 0.2252      | 0.0349  | C5:1       | -0.2113     | 0.0468  |
| Trp            | 0.3056      | 0.0038  | C5:1-DC    | 0.0315      | 0.7697  |
| Tyr_1          | 0.2057      | 0.0545  | C6         | 0.3533      | 0.0007  |
| Val_1          | 0.2420      | 0.0231  | C6:1       | 0.2500      | 0.0181  |
|                |             |         | C7-DC      | 0.1063      | 0.3216  |
|                |             |         | C8         | -0.0839     | 0.4342  |
|                |             |         | C9         | -0.1719     | 0.1072  |
